# Supplementary material for: Exploring lead free Rb 2 AlInX 6 halide double perovskites for advanced energy harvesting applications
Source: Royal Society of Chemistry journal article supplement (doi:10.1039/d5ra06712j), 2025-01-01

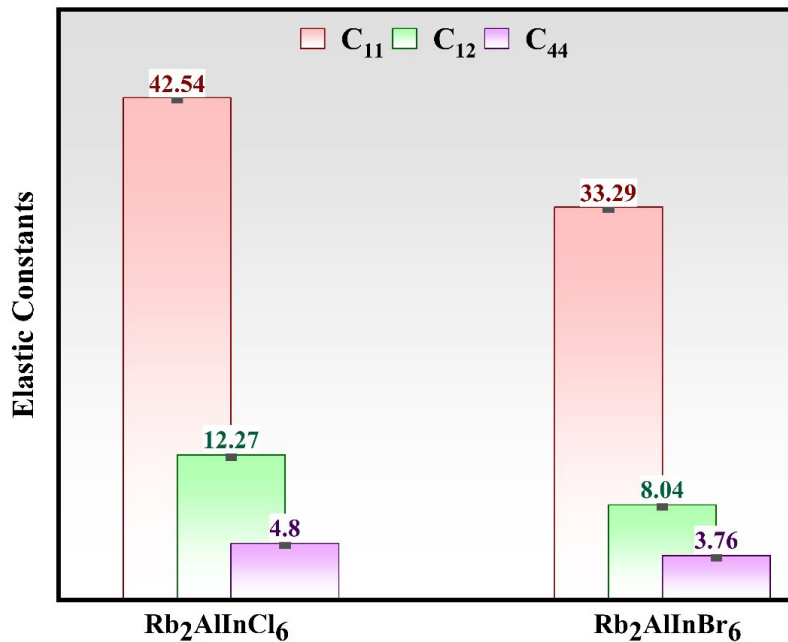

Supplement: d5ra06712j2.pdf [file d5ra06712j2.pdf]
